# Supplementary material
Source: HighWire-hosted journal article supplement (https://gut.bmj.com/content/69/10/1796)
Supplement: inline-supplementary-material-2 [file inline-supplementary-material-2.pdf]

## Supplementary Methods

### *Catalyzed Reporter Deposition (CARD) - Fluorescence In Situ Hybridization (FISH)*

Paraffin embedded sections of 6  $\mu\text{m}$  thickness prepared as described above for immunohistochemistry were collected on polylysine coated glass slides (3 per each slide) and subsequently subjected to CARD-FISH.

- For CARD-FISH, tissue sections were incubated 3X5 min in 100% Xylool (The Geyer GmbH, Renningen, Germany) followed by incubation in decreasing ethanol series (3X5 min in ethanol 99% followed by 5 min in 95%, 80% and 50% ethanol respectively). After that, the slides were dipped in wash buffer (WB) for 1 min followed by incubation in 0.2M HCL in WB for 10 min at RT and washing for 1 min again in WB.
- Permeabilization was achieved by dipping the glass slides containing tissue sections sequentially in proteinase K-buffer, lysozyme-buffer and achromopeptidase-buffer (see table 5) each for 5 min at 37°C with 1 minute long washing steps at RT in WB in between enzymatic treatments.
- The slides were air dried and the sections were circled using Pap-pen and were prepared for the hybridization step.
- The sections were hybridized for 3 h at 46°C in a pre-warmed hybridization chamber (made out of a 50 mL Falcon tube, in a humid environment created by soaking a paper tissue with 35% formamide in ultrapure water and place it at the bottom of the tube) using pre-warmed hybridization buffer containing the HRP-labelled probes (s. table 5).
- Following hybridization, glass slides containing sections were incubated in 50 mL of pre-warmed WB2 for 15 min at 48°C.
- After washing, filters were incubated for 15 min at RT in 1x PBS (pH=7.6) to equilibrate the HRP-labeled probe. Subsequently, CARD-FISH was performed by incubating the sections for 20 min at 46°C in the dark in amplification buffer.
- Afterwards, the slides containing sections were rinsed in 1x PBS for 10 min at RT followed by staining with 4',6-diamidino-2-phenylindole (DAPI) 1  $\mu\text{g mL}^{-1}$  for 10 min at RT, washing in ultrapure water, air dried and embedded in mounting medium and stored at -20°C prior to imaging.

For the CARD-FISH we used a mixture of HRP-labelled EUB338 I, II and III (Aman et al., 1990; Daims et al., 1999) probes and the HRP-labelled NON338 (NONEUB) (Wallner et al., 1993) probe, with NONEUB probe being used to detect the potential false positive signals on hybridized tissue sections and to test probe specificity. In addition, tissue sections were used for the complete CARD-FISH procedure but using hybridization probe-free buffer, in order to identify potential false positive signals due to tissue endogenous peroxidase activity. False positive signals were not observed during microscopic investigations, although microbial cells could be observed on the tissue sections by DAPI (Supplementary Figure S2)

All the steps performed with the glass slides containing paraffin sections were performed under sterile conditions. All the glass jars used for the above treatments were autoclaved, MQ water was autoclaved and filter sterilized, using 0.2  $\mu\text{m}$  PC Isopore Membrane (MERCK, Darmstadt, Germany) and used to prepare all buffers. The buffers were freshly prepared before usage. Hybridization, washing and amplification buffers were prepared with molecular grade DNase-, RNase-free solutions and autoclaved, filter sterilized MQ water. In addition, we performed controls to verify the sterility of all solutions. An empty polylysine coated slide was run alongside slides containing tissue sections following each experimental step described above. Moreover, a second control was implemented consisting of 500  $\mu\text{L}$  of HB containing probe, which was incubated at 46°C for 3 h and further filtered on the 0.2  $\mu\text{m}$  pore size GTTP type polycarbonate filter and run for the tyramide amplification reaction being further imaged under fluorescence microscope. Sterility controls used i.e. the empty polylysine slide, the paraffin sections containing slide and the filter containing filtrate of the hybridization buffer did not showed any positively hybridized or DAPI stained cell on their surface.

## Supplementary Tables

Supplementary Table 1: Statistics for fit of db-RDA per tissue; 1000 permutations

|                     | dbRDA1   | dbRDA2   | R <sup>2</sup> | q <sub>FDR</sub> |
|---------------------|----------|----------|----------------|------------------|
| <b>Mesenteric</b>   |          |          |                |                  |
| LBP                 | 0.24     | -0.97    | 0.07           | 0.20             |
| TNFA                | 0.94     | 0.35     | 0.03           | 0.51             |
| IL6                 | -0.20    | -0.98    | 0.16           | 0.04             |
| age                 | -0.94    | -0.35    | 0.02           | 0.60             |
| BMI                 | -0.46    | -0.89    | 0.15           | 0.03             |
| CRP                 | -0.22    | -0.98    | 0.09           | 0.09             |
| HOMA                | 0.81     | -0.59    | 0.88           | 0.001            |
| HbA1c               | 0.24     | -0.97    | 0.12           | 0.06             |
| Bact load           | 0.98     | 0.18     | 0.82           | 0.001            |
| <b>Omental</b>      |          |          |                |                  |
| LBP                 | 0.35364  | -0.93538 | 0.28           | 0.003            |
| TNFA_Serum          | 0.68956  | 0.72423  | 0.17           | 0.017            |
| IL6_Serum           | 0.42405  | -0.90564 | 0.07           | 0.203            |
| age                 | -0.99998 | 0.00672  | 0.06           | 0.287            |
| BMI                 | -0.13176 | 0.99128  | 0.13           | 0.053            |
| CRP                 | -0.72075 | -0.69319 | 0.06           | 0.235            |
| HOMA                | 0.99839  | -0.05671 | 0.57           | 0.001            |
| HbA1c               | 0.68907  | -0.7247  | 0.1            | 0.095            |
| Adipocyte_size      | 0.27558  | -0.96128 | 0.02           | 0.665            |
| ATM                 | 0.61315  | -0.78997 | 0.01           | 0.734            |
| bact_load           | 0.99873  | -0.0504  | 0.22           | 0.007            |
| <b>Subcutaneous</b> |          |          |                |                  |
| LBP                 | 0.94998  | -0.31232 | 0.08           | 0.177            |
| TNFA_Serum          | -0.19994 | 0.97981  | 0.28           | 0.003            |
| IL6_Serum           | -0.60836 | -0.79366 | 0.1            | 0.089            |
| age                 | 0.45129  | -0.89238 | 0.06           | 0.254            |
| BMI                 | 0.67544  | -0.73742 | 0              | 0.932            |
| CRP                 | 0.91348  | -0.40689 | 0.47           | 0.001            |
| HOMA                | 0.93652  | 0.35061  | 0.11           | 0.08             |
| HbA1c               | -0.21669 | 0.97624  | 0.14           | 0.037            |
| Adipocyte_size      | -0.99888 | -0.04723 | 0.01           | 0.779            |
| ATM                 | -0.78253 | 0.62261  | 0.16           | 0.024            |
| bact_load           | 0.84125  | 0.54065  | 0.29           | 0.005            |
| <b>Blood</b>        |          |          |                |                  |
| LBP                 | -0.98464 | -0.17461 | 0.19           | 0.008            |
| TNFA_Serum          | -0.14505 | 0.98942  | 0.44           | 0.001            |
| IL6_Serum           | -0.97247 | -0.23301 | 0.49           | 0.001            |
| age                 | -0.93292 | 0.36009  | 0.27           | 0.001            |
| BMI                 | 0.92286  | 0.38513  | 0.02           | 0.564            |
| CRP                 | -0.63027 | 0.77638  | 0.33           | 0.001            |
| HOMA                | 0.59456  | 0.80405  | 0.01           | 0.708            |
| HbA1c               | -0.1643  | 0.98641  | 0.11           | 0.066            |
| bact_load           | 0.71806  | -0.69599 | 0.08           | 0.117            |

Supplementary Table 2: Statistics differential abundance (DESeq2)

| Phylum Level                 |        |       |       |         |                  |                  |
|------------------------------|--------|-------|-------|---------|------------------|------------------|
| baseMean                     | log2FC | lfcSE | stat  | pvalue  | q <sub>FDR</sub> | Phylum           |
| <b>omental vs blood</b>      |        |       |       |         |                  |                  |
| 2.18                         | -2.49  | 2.37  | -1.05 | 2.9E-01 | 8.3E-01          | Patescibacteria  |
| 0.20                         | -1.62  | 2.90  | -0.56 | 5.8E-01 | 8.3E-01          | Armatimonadetes  |
| 41.46                        | -13.11 | 2.90  | -4.53 | 6.0E-06 | 3.9E-05          | Chloroflexi      |
| 10.03                        | -27.62 | 2.90  | -9.53 | 1.6E-21 | 2.1E-20          | Planctomycetes   |
| 11.72                        | 1.72   | 1.83  | 0.94  | 3.5E-01 | 8.3E-01          | Actinobacteria   |
| 0.00                         | -0.50  | 1.21  | -0.41 | 6.8E-01 | 8.9E-01          | Gemmatimonadetes |
| 1395.24                      | 1.98   | 0.68  | 2.92  | 3.5E-03 | 1.5E-02          | Firmicutes       |
| 0.40                         | -2.10  | 2.90  | -0.72 | 4.7E-01 | 8.3E-01          | Tenericutes      |
| 0.28                         | -1.82  | 2.90  | -0.63 | 5.3E-01 | 8.3E-01          | Bacteroidetes    |
| 16481.48                     | 0.37   | 0.61  | 0.61  | 5.4E-01 | 8.3E-01          | Proteobacteria   |
| <b>mesenteric vs blood</b>   |        |       |       |         |                  |                  |
| 15.05                        | 7.12   | 2.89  | 2.46  | 1.4E-02 | 2.9E-02          | Cyanobacteria    |
| 0.22                         | -2.90  | 2.90  | -1.00 | 3.2E-01 | 3.9E-01          | Armatimonadetes  |
| 42.73                        | -6.82  | 2.75  | -2.48 | 1.3E-02 | 2.9E-02          | Chloroflexi      |
| 10.68                        | -27.31 | 2.90  | -9.42 | 4.4E-21 | 5.7E-20          | Planctomycetes   |
| 1322.63                      | 9.72   | 2.18  | 4.46  | 8.3E-06 | 5.4E-05          | Actinobacteria   |
| 10.30                        | 7.65   | 2.57  | 2.97  | 3.0E-03 | 1.3E-02          | Elusimicrobia    |
| 0.05                         | -1.20  | 2.90  | -0.42 | 6.8E-01 | 7.3E-01          | Gemmatimonadetes |
| 1422.09                      | 1.73   | 0.60  | 2.88  | 4.0E-03 | 1.3E-02          | Firmicutes       |
| 0.40                         | -2.83  | 2.90  | -0.98 | 3.3E-01 | 3.9E-01          | Tenericutes      |
| 0.93                         | -0.58  | 2.34  | -0.25 | 8.0E-01 | 8.0E-01          | Fusobacteria     |
| 0.32                         | -3.15  | 2.90  | -1.09 | 2.8E-01 | 3.9E-01          | Bacteroidetes    |
| 30.30                        | 3.16   | 1.31  | 2.42  | 1.6E-02 | 2.9E-02          | Patescibacteria  |
| 15691.88                     | 1.09   | 0.56  | 1.94  | 5.2E-02 | 8.4E-02          | Proteobacteria   |
| <b>subcutaneous vs blood</b> |        |       |       |         |                  |                  |
| 0.20                         | -2.27  | 2.53  | -0.90 | 3.7E-01 | 4.6E-01          | Cyanobacteria    |
| 0.25                         | -3.56  | 2.86  | -1.24 | 2.1E-01 | 3.2E-01          | Armatimonadetes  |
| 57.73                        | -13.79 | 2.89  | -4.76 | 1.9E-06 | 2.3E-05          | Chloroflexi      |
| 18.58                        | -4.15  | 2.89  | -1.44 | 1.5E-01 | 3.1E-01          | Planctomycetes   |
| 29.27                        | 3.63   | 1.70  | 2.14  | 3.3E-02 | 1.4E-01          | Actinobacteria   |
| 0.78                         | 0.47   | 2.89  | 0.16  | 8.7E-01 | 8.7E-01          | Elusimicrobia    |
| 2423.65                      | 0.55   | 0.63  | 0.87  | 3.9E-01 | 4.6E-01          | Firmicutes       |
| 0.57                         | -4.13  | 2.90  | -1.43 | 1.5E-01 | 3.1E-01          | Tenericutes      |
| 25.28                        | 4.44   | 2.57  | 1.73  | 8.4E-02 | 2.5E-01          | Fusobacteria     |
| 1.13                         | -3.64  | 2.90  | -1.26 | 2.1E-01 | 3.2E-01          | Bacteroidetes    |
| 41.68                        | 3.48   | 1.65  | 2.12  | 3.4E-02 | 1.4E-01          | Patescibacteria  |
| 16250.03                     | 0.47   | 0.61  | 0.77  | 4.4E-01 | 4.8E-01          | Proteobacteria   |
| <b>omental vs mesenteric</b> |        |       |       |         |                  |                  |
| 13.82                        | -7.55  | 2.90  | -2.61 | 9.1E-03 | 2.3E-02          | Cyanobacteria    |
| 3.54                         | -3.33  | 2.83  | -1.18 | 2.4E-01 | 3.0E-01          | Chloroflexi      |
| 1265.84                      | -6.63  | 1.74  | -3.81 | 1.4E-04 | 6.1E-04          | Actinobacteria   |
| 9.66                         | -9.75  | 2.61  | -3.74 | 1.8E-04 | 6.1E-04          | Elusimicrobia    |
| 0.04                         | 1.02   | 0.86  | 1.18  | 2.4E-01 | 3.0E-01          | Gemmatimonadetes |
| 2535.17                      | 0.91   | 0.61  | 1.49  | 1.4E-01 | 2.3E-01          | Firmicutes       |
| 0.04                         | 1.15   | 0.69  | 1.67  | 9.5E-02 | 1.9E-01          | Tenericutes      |
| 0.34                         | 0.33   | 1.42  | 0.23  | 8.2E-01 | 8.2E-01          | Fusobacteria     |
| 24.21                        | -6.98  | 1.59  | -4.39 | 1.2E-05 | 1.2E-04          | Patescibacteria  |
| 24708.17                     | 0.12   | 0.49  | 0.25  | 8.0E-01 | 8.2E-01          | Proteobacteria   |

| omental vs subcutaneous    |        |       |        |         |         |                  |                      |
|----------------------------|--------|-------|--------|---------|---------|------------------|----------------------|
| baseMean                   | log2FC | lfcSE | stat   | pvalue  | padj    | Phylum           |                      |
| 1.15                       | 3.74   | 2.90  | 1.29   | 2.0E-01 | 4.3E-01 | Cyanobacteria    |                      |
| 0.01                       | 2.15   | 0.94  | 2.27   | 2.3E-02 | 6.3E-02 | Chloroflexi      |                      |
| 0.64                       | -0.82  | 2.89  | -0.28  | 7.8E-01 | 8.2E-01 | Planctomycetes   |                      |
| 46.03                      | -0.57  | 1.61  | -0.35  | 7.2E-01 | 8.2E-01 | Actinobacteria   |                      |
| 0.59                       | -0.65  | 2.89  | -0.22  | 8.2E-01 | 8.2E-01 | Elusimicrobia    |                      |
| 0.01                       | 2.22   | 0.94  | 2.36   | 1.8E-02 | 6.3E-02 | Gemmatimonadetes |                      |
| 4147.83                    | 0.39   | 0.62  | 0.63   | 5.3E-01 | 7.3E-01 | Firmicutes       |                      |
| 14.06                      | -7.00  | 2.75  | -2.54  | 1.1E-02 | 6.0E-02 | Fusobacteria     |                      |
| 0.55                       | 2.10   | 2.90  | 0.72   | 4.7E-01 | 7.3E-01 | Bacteroidetes    |                      |
| 36.89                      | -7.40  | 1.82  | -4.07  | 4.7E-05 | 5.2E-04 | Patescibacteria  |                      |
| 29047.32                   | 0.53   | 0.52  | 1.01   | 3.1E-01 | 5.7E-01 | Proteobacteria   |                      |
| subcutaneous vs mesenteric |        |       |        |         |         |                  |                      |
| baseMean                   | log2FC | lfcSE | stat   | pvalue  | padj    | Phylum           |                      |
| 1.64                       | -3.21  | 2.90  | -1.11  | 2.7E-01 | 5.3E-01 | Cyanobacteria    |                      |
| 2732.19                    | -6.49  | 1.72  | -3.77  | 1.6E-04 | 2.0E-03 | Actinobacteria   |                      |
| 21.42                      | -4.90  | 2.49  | -1.96  | 5.0E-02 | 1.6E-01 | Elusimicrobia    |                      |
| 5.60                       | -5.57  | 2.89  | -1.92  | 5.4E-02 | 1.6E-01 | Chloroflexi      |                      |
| 15.48                      | 5.11   | 2.17  | 2.36   | 1.8E-02 | 1.1E-01 | Fusobacteria     |                      |
| 32540.68                   | -0.69  | 0.49  | -1.42  | 1.6E-01 | 3.7E-01 | Proteobacteria   |                      |
| omental vs blood           |        |       |        |         |         |                  |                      |
| baseMean                   | log2FC | lfcSE | stat   | pvalue  | padj    | Phylum           |                      |
| 36.55                      | -29.09 | 2.90  | -10.04 | 1.0E-23 | 3.9E-22 | Chloroflexi      | UTCFOX1              |
| 6.80                       | -5.90  | 2.32  | -2.55  | 1.1E-02 | 4.6E-02 | Firmicutes       | Lactococcus          |
| 2348.03                    | 3.99   | 1.05  | 3.79   | 1.5E-04 | 8.2E-04 | Firmicutes       | Streptococcus        |
| 1.96                       | -26.57 | 2.90  | -9.16  | 5.1E-20 | 3.2E-19 | Proteobacteria   |                      |
| 12.94                      | -27.61 | 2.82  | -9.79  | 1.3E-22 | 1.6E-21 | Proteobacteria   | Bdellovibrio         |
| 4.09                       | -8.15  | 2.90  | -2.81  | 4.9E-03 | 2.3E-02 | Proteobacteria   | Tahibacter           |
| 67639.97                   | 9.36   | 1.02  | 9.22   | 2.9E-20 | 2.2E-19 | Proteobacteria   | Acinetobacter        |
| 7.49                       | -28.39 | 2.90  | -9.79  | 1.2E-22 | 1.6E-21 | Proteobacteria   | Sutterella           |
| 5.14                       | -27.88 | 2.90  | -9.62  | 6.7E-22 | 6.4E-21 | Proteobacteria   | Delftia              |
| mesenteric vs blood        |        |       |        |         |         |                  |                      |
| baseMean                   | log2FC | lfcSE | stat   | pvalue  | padj    | Phylum           |                      |
| 54.05                      | -9.39  | 2.89  | -3.25  | 1.2E-03 | 4.8E-03 | Chloroflexi      | UTCFOX1              |
| 2.41                       | -25.61 | 2.90  | -8.83  | 1.0E-18 | 5.5E-18 | Proteobacteria   |                      |
| 48.03                      | 30.00  | 2.90  | 10.36  | 4.0E-25 | 1.5E-23 | Proteobacteria   | Pseudochrobactrum    |
| 16.91                      | -28.21 | 2.90  | -9.74  | 2.1E-22 | 3.9E-21 | Proteobacteria   | Methylocystis        |
| 5.92                       | -26.82 | 2.90  | -9.25  | 2.2E-20 | 1.7E-19 | Proteobacteria   | Tahibacter           |
| 3.58                       | 26.16  | 2.90  | 9.02   | 1.8E-19 | 1.1E-18 | Proteobacteria   | Escherichia-Shigella |
| 5259.91                    | 5.84   | 0.89  | 6.53   | 6.4E-11 | 3.0E-10 | Proteobacteria   | Acinetobacter        |
| 9.91                       | 27.84  | 2.90  | 9.61   | 7.5E-22 | 9.2E-21 | Proteobacteria   | Thauera              |
| 6.38                       | -26.92 | 2.90  | -9.29  | 1.6E-20 | 1.5E-19 | Proteobacteria   | Delftia              |
| 442.50                     | 6.70   | 2.47  | 2.71   | 6.7E-03 | 2.5E-02 | Proteobacteria   | Rhodoferrax          |
| subcutaneous vs blood      |        |       |        |         |         |                  |                      |
| baseMean                   | log2FC | lfcSE | stat   | pvalue  | padj    | Phylum           |                      |
| 43.25                      | -13.24 | 2.90  | -4.57  | 4.9E-06 | 1.6E-05 | Chloroflexi      | UTCFOX1              |
| 13.20                      | 28.12  | 2.51  | 11.19  | 4.6E-29 | 1.5E-27 | Firmicutes       | Gemella              |
| 719.71                     | -8.26  | 2.89  | -2.86  | 4.2E-03 | 1.1E-02 | Firmicutes       | Lactobacillus        |
| 2098.89                    | 3.03   | 0.93  | 3.26   | 1.1E-03 | 3.2E-03 | Firmicutes       | Streptococcus        |
| 2.29                       | -26.24 | 2.90  | -9.05  | 1.5E-19 | 5.9E-19 | Proteobacteria   |                      |
| 16.13                      | -28.88 | 2.90  | -9.97  | 2.1E-23 | 2.3E-22 | Proteobacteria   | Methylocystis        |
| 15.99                      | -28.87 | 2.79  | -10.34 | 4.6E-25 | 7.3E-24 | Proteobacteria   | Bdellovibrio         |
| 7.85                       | 27.55  | 2.90  | 9.51   | 1.9E-21 | 1.2E-20 | Patescibacteria  | uncultured bacterium |
| 4.82                       | -27.24 | 2.90  | -9.40  | 5.7E-21 | 3.1E-20 | Proteobacteria   | Tahibacter           |
| 5.33                       | 26.51  | 2.90  | 9.15   | 5.9E-20 | 2.7E-19 | Proteobacteria   | Enterobacter         |
| 2664.98                    | 4.90   | 0.87  | 5.62   | 1.9E-08 | 6.7E-08 | Proteobacteria   | Acinetobacter        |

|                                   |        |      |        |         |         |                 |                         |
|-----------------------------------|--------|------|--------|---------|---------|-----------------|-------------------------|
| 11.56                             | -28.43 | 2.90 | -9.81  | 1.0E-22 | 8.3E-22 | Proteobacteria  | Sutterella              |
| <b>omental vs mesenteric</b>      |        |      |        |         |         |                 |                         |
| 178.70                            | -30.00 | 2.90 | -10.35 | 4.0E-25 | 3.7E-23 | Proteobacteria  | Pseudochrobactrum       |
| 6.08                              | -28.18 | 2.90 | -9.72  | 2.5E-22 | 7.7E-21 | Proteobacteria  | Thauera                 |
| 8.92                              | -28.68 | 2.90 | -9.90  | 4.3E-23 | 2.0E-21 | Proteobacteria  | Deefgea                 |
| 3.81                              | -27.53 | 2.90 | -9.49  | 2.2E-21 | 5.2E-20 | Proteobacteria  | uncultured              |
| <b>omental vs subcutaneous</b>    |        |      |        |         |         |                 |                         |
| 2.66                              | -27.03 | 2.90 | -9.32  | 1.1E-20 | 2.6E-19 | Elusimicrobia   | uncultured<br>bacterium |
| 5.07                              | -27.91 | 2.90 | -9.63  | 6.0E-22 | 1.9E-20 | Patescibacteria | uncultured<br>bacterium |
| 21.46                             | -29.90 | 2.90 | -10.32 | 5.7E-25 | 2.8E-23 | Proteobacteria  | Enterobacter            |
| 63369.91                          | 2.50   | 0.83 | 3.02   | 2.5E-03 | 4.6E-02 | Proteobacteria  | Acinetobacter           |
| 25.22                             | -29.88 | 2.90 | -10.32 | 6.0E-25 | 2.8E-23 | Proteobacteria  | uncultured              |
| <b>subcutaneous vs mesenteric</b> |        |      |        |         |         |                 |                         |
| 2.28                              | -26.26 | 2.90 | -9.05  | 1.4E-19 | 2.5E-18 | Firmicutes      | Nosocomiicoccus         |
| 11.03                             | 25.00  | 2.49 | 10.04  | 9.9E-24 | 3.6E-22 | Firmicutes      | Gemella                 |
| 26.07                             | -29.58 | 2.90 | -10.21 | 1.8E-24 | 1.0E-22 | Proteobacteria  | Sphingopyxis            |
| 284.47                            | -30.00 | 2.90 | -10.36 | 3.9E-25 | 4.3E-23 | Proteobacteria  | Pseudochrobactrum       |
| 6.57                              | 25.97  | 2.90 | 8.96   | 3.2E-19 | 5.0E-18 | Patescibacteria | uncultured<br>bacterium |
| 30.55                             | 28.14  | 2.90 | 9.71   | 2.6E-22 | 5.7E-21 | Proteobacteria  | Enterobacter            |
| 11.56                             | -28.46 | 2.90 | -9.82  | 9.2E-23 | 2.5E-21 | Proteobacteria  | Deefgea                 |

Supplementary Table 3: Tested primers and amplification combinations thereof

| Name                | Sequence (5'-3')                             | Reference                                       |
|---------------------|----------------------------------------------|-------------------------------------------------|
| <i>BAc08F</i>       | agagtttgatcctggctcag                         | (Baker et al., 2003; Salipante et al., 2013)    |
| <i>V3-R</i>         | attaccgggctgctgg                             | (Claesson et al., 2010)                         |
| <i>V3-F</i>         | actcctacgggagcagcag                          | (Claesson et al., 2010)                         |
| <i>V4-F</i>         | actggcgtaaagcg                               | (Claesson et al., 2010)                         |
| <i>V5-R</i>         | ccgtcaattccttgagttt                          | (Claesson et al., 2010)                         |
| <i>V6-R</i>         | cgacagccatgcagcacct                          | (Claesson et al., 2010)                         |
| <i>R1492-R</i>      | tacggtacctgttacgactt                         | (Baker et al., 2003)                            |
| <i>V6-F</i>         | ttgacggggcccgcac                             | (Salipante et al., 2013)                        |
| <i>Uni1390-R</i>    | gacggcggtgtgtacaa                            | (Siala et al., 2008)                            |
| <i>806-R</i>        | ggactaccagggtatctaata                        | (Bik et al., 2006)                              |
| <i>927-R</i>        | cccgtcaattcatttgagtt                         | (Bik et al., 2006)                              |
| <i>63-F</i>         | gcaggcctaacacatgcaagtc                       | (Claesson et al., 2010)                         |
| <i>355-R</i>        | ctgctgcctcccgtaggagt                         | (Claesson et al., 2010; Salipante et al., 2013) |
| <i>8-fw</i>         | agagtttgatymtgctcag                          | (Klindworth et al., 2012)                       |
| <i>357-rev</i>      | ctgctgcctyccgta                              | (Klindworth et al., 2012)                       |
| <i>341-fw</i>       | cctacggnggcwgcag                             | (Klindworth et al., 2012)                       |
| <i>805-rev</i>      | gactachvgggtatctaatacc                       | (Klindworth et al., 2012)                       |
| <i>785-fw</i>       | ggmttagatacccbdgta                           | (Klindworth et al., 2012)                       |
| <i>1068-rev</i>     | ctgacgrcrgccatgc                             | (Klindworth et al., 2012)                       |
| <i>1053-fw</i>      | gcatggcygycgtcag                             | (Klindworth et al., 2012)                       |
| <i>1510-rev</i>     | rgytacctgttacgactt                           | (Klindworth et al., 2012)                       |
| <i>564-fw</i>       | aytgggydtaaagng                              | (Klindworth et al., 2012)                       |
| <i>540-rev</i>      | ctnygtmttaccgcgctgc                          | (Klindworth et al., 2012)                       |
| <i>8-fw-short</i>   | agagtttgatcmtggc                             | (Klindworth et al., 2012)                       |
| <i>357-rev-long</i> | tgctgcctcccgtaggagt                          | (Klindworth et al., 2012)                       |
| <b>V-region</b>     | <b>Results</b>                               |                                                 |
| V1-2                | Additional but distinguishable human product |                                                 |
| V1-3                | One band with human product                  |                                                 |
| V1-4                | Only bacterial product, but low yield        |                                                 |
| V1-5                | Only bacterial product, but low yield        |                                                 |
| V3                  | One band with human product                  |                                                 |
| V3-6                | Only bacterial product, but low yield        |                                                 |
| V4-5                | Only bacterial product, good results         |                                                 |
| V4-6                | Only bacterial product, but low yield        |                                                 |
| V4-9                | Only bacterial product, but low yield        |                                                 |
| V6                  | Two bands with human products                |                                                 |
| V6-8                | Only bacterial product, good results         |                                                 |
| V6-9                | Low yield                                    |                                                 |

**Supplementary Table 4: Tested polymerases and results for low bacterial biomass samples**

| Polymerase                             | Results                                                | Supplier                 |
|----------------------------------------|--------------------------------------------------------|--------------------------|
| Taq DNA polymerase, recombinant 5 U/μl | No products                                            | ThermoFisher (#EP0402)   |
| Accuprime HS                           | No products                                            | ThermoFisher (#12339016) |
| VitaTaq                                | Only NC were amplified                                 | Procomcure Biotech       |
| FastStart PCR master                   | Good results, i.e. amplified samples and NC were clean | Sigma-Aldrich            |
| Biozym Long Range PCR                  | No products                                            | Biozym                   |
| Phusion II (HS)                        | Contaminated                                           | ThermoFisher (F549S)     |
| GoTaq                                  | Good results, i.e. amplified samples and NC were clean | Promega                  |
| Q5 high fidelity HS                    | Good results, i.e. amplified samples and NC were clean | NEB                      |
| DreamTaq                               | Some NC contaminated                                   | ThermoFisher             |

**Supplementary Table 5: CARD-FISH solutions and materials**

| Buffer type                                           | composition                                                                                                                                                                                                                     |
|-------------------------------------------------------|---------------------------------------------------------------------------------------------------------------------------------------------------------------------------------------------------------------------------------|
| Wash buffer                                           | 20 mM Tris-HCl (pH 7.8) (Invitrogen, Carlsbad, CA, USA)                                                                                                                                                                         |
| Proteinase K- buffer                                  | 10 μg mL <sup>-1</sup> proteinase K (Sigma-Aldrich, St. Louise, Missouri, USA)<br>0.01M Tris-HCL (pH=7.8), 0.05 EDTA (pH=8), 0.5% SDS buffer                                                                                    |
| Lysozyme-buffer                                       | 10 μg mL <sup>-1</sup> lysozyme (Sigma-Aldrich, St. Louise, Missouri, USA)<br>0.1M Tris-HCL (pH=7.8), 0.05M EDTA (pH=8)                                                                                                         |
| Achromopeptidase-buffer                               | 60 U mL <sup>-1</sup> achromopeptidase (Sigma-Aldrich, St. Louise, Missouri, USA)<br>0.01M Tris-HCL, 0.01M NaCl                                                                                                                 |
| HPR-labelled probe                                    | 0.166 ng mL <sup>-1</sup> HPR labelled probe (Fluka, Waltham, USA Boehringer, Mannheim Germany)                                                                                                                                 |
| Hybridization buffer                                  | 0.9M NaCl, 20mM Tris-HCl (pH=7.5), 10% (w/v) dextran sulfate, 0.02% (w/v) SDS 35% (v/v) 35% formamide, 1% (w/v) blocking reagent                                                                                                |
| Wash buffer 2                                         | 70mM NaCl, 5mM EDTA (pH=8.0), 20mM Tris-HCl (pH=7.5), and 0.01% SDS                                                                                                                                                             |
| Amplification buffer with Alexa 594-labeled tyramides | 1 μg mL <sup>-1</sup> Alexa 594-labeled tyramides (ThermoFisherScientific, Waltham, Massachusetts, USA)<br>1× PBS, 2M NaCl, 0.1% (w/v) blocking reagent, 10% (w/v) dextran sulfate, 0.0015% (v/v) H <sub>2</sub> O <sub>2</sub> |
| Mounting medium                                       | low fluorescence glycerol mountant (Citifluor AF1, Citifluor, London, GB) , mounting fluid Vecta Shield (Vecta Laboratories Burlingame, CA, USA ) in 4:1 (v/v) ratio                                                            |
